# Supplementary material for: Rapid Screening Using Pathomorphologic Interpretation to Detect BRAF V600E Mutation and Microsatellite Instability in Colorectal Cancer
Source: Oxford University Press journal article supplement (doi:10.1158/1078-0432.ccr-21-4391), 2022-04-01
Supplement: ccr-21-4391_supplementary_table_1_suppts1.docx [file ccr-21-4391_supplementary_table_1_suppts1.docx]

| **Supplementary Table 1.** Thirty-three pathomorphological features. | |
| --- | --- |
| Pahomorphological Feature | Class |
| cellular atypia high | C |
| cribriform with mucin minus or plus | N |
| cribriform with mucin minus | N |
| cribriform with mucin plus | N |
| goblet cell | C |
| microcyst | N |
| mucin minus regardless of cell size and shape | N |
| mucin plus regardless of cell size and shape | N |
| mucus leakage regardless of cell size and shape | N |
| nuclear shape is elliptic or oval | C |
| nuclear shape is elliptic | N |
| nuclear shape is oval | N |
| papillary structure with serrated or non-serrated type | R |
| papillary structure with non-serrated with mucin minus or plus | R |
| papillary structure with non-serrated with mucin minus | R |
| papillary structure with non-serrated with mucin plus | R |
| rail pattern | N |
| signet ring cell | C |
| signet ring cell with mucin plus | C |
| solid nest regardless of the size of nest | N |
| solid nest with large nest regardless of cell type | N |
| solid nest with large nest consisting of usual cell | N |
| solid nest with small nest regardless of cell type | N |
| solid nest with small nest consisting of usual cell | N |
| trabecular structure with any mucin pattern | N |
| trabecular structure with mucin minus | N |
| trabecular structure mucus leakage | N |
| tubular structure with any mucin pattern | C |
| tubular structure with mucin minus | C |
| tubular structure with mucin plus | C |
| tubular structure with mucus leakage | C |
| tumor budding | C |
| the percent of tumor content is over 50% | N |
| C; conventional pathomorphological features |  |
| R; referred pathomorophological features |  |
| N; new pathological featuers |  |
