# Supplementary material for: Rapid Screening Using Pathomorphologic Interpretation to Detect BRAF V600E Mutation and Microsatellite Instability in Colorectal Cancer
Source: Oxford University Press journal article supplement (doi:10.1158/1078-0432.ccr-21-4391), 2022-04-01
Supplement: ccr-21-4391_supplementary_table_3_suppts3.docx [file ccr-21-4391_supplementary_table_3_suppts3.docx]

| **Supplementary Table 3.** Numbers of combinations of genes, color corrections, and pathomorphological features. | | | | |
| --- | --- | --- | --- | --- |
|  |
|  | Image Type | | |  |  |
| Gene abnormality | Original | Corrected | Monotonized | Total |  |
| *BRAF*V600E | 1,033 | 931 | 1,061 | 3,025 |  |
| MSI-H | 967 | 891 | 998 | 2,856 |  |
| *KRAS* | 1,133 | 935 | 1,126 | 3,194 |  |
| Total | 3,133 | 2,757 | 3,185 | 9,075 |  |
