# Supplementary material for: Rapid Screening Using Pathomorphologic Interpretation to Detect BRAF V600E Mutation and Microsatellite Instability in Colorectal Cancer
Source: Oxford University Press journal article supplement (doi:10.1158/1078-0432.ccr-21-4391), 2022-04-01
Supplement: ccr-21-4391_supplementary_table_4_suppts4.docx [file ccr-21-4391_supplementary_table_4_suppts4.docx]

| **Supplementary Table 4.** Concordance rate for the extraction of the 33 pathomorphological features used in this study between three pathologists. | | | | | | | |
| --- | --- | --- | --- | --- | --- | --- | --- |
| Pahomorphological Feature | A1 vs SF1 | A2 vs SF1 | B1 vs SF1 | B2 vs SF1 | SF1 vs SF2 | A1 vs A2 | B1 vs B2 |
| cellular atypia high | 0.48 | 0.69 | 0.16 | 0.06 | 1.00 | 0.79 | 0.69 |
| cribriform with mucin minus or plus | 0.58 | 0.58 | 0.37 | 0.37 | 0.90 | 0.79 | 1.00 |
| cribriform with mucin minus | 0.79 | 0.79 | 0.79 | 0.79 | 1.00 | 1.00 | 1.00 |
| cribriform with mucin plus | 0.69 | 0.79 | 0.58 | 0.68 | 1.00 | 0.89 | 0.89 |
| goblet cell | 0.69 | 0.58 | 0.58 | 0.79 | 1.00 | 0.89 | 0.79 |
| microcyst | 0.20 | 0.50 | 0.20 | 0.30 | 0.90 | 0.70 | 0.70 |
| mucin minus regardless of cell size and shape | 0.69 | 0.79 | 0.79 | 0.79 | 0.89 | 0.89 | 1.00 |
| mucin plus regardless of cell size and shape | 0.90 | 0.90 | 0.69 | 0.69 | 1.00 | 1.00 | 1.00 |
| mucus leakage regardless of cell size and shape | 0.79 | 0.79 | 0.79 | 0.79 | 1.00 | 1.00 | 1.00 |
| nuclear shape is elliptic or oval | -0.06 | 0.17 | 0.37 | 0.06 | 1.00 | 0.38 | 0.48 |
| nuclear shape is elliptic | 0.79 | 0.79 | 0.79 | 0.79 | 1.00 | 1.00 | 1.00 |
| nuclear shape is oval | -0.06 | 0.16 | -0.06 | 0.26 | 1.00 | 0.79 | 0.68 |
| papillary structure with serrated or non-serrated type | 0.79 | 0.79 | 0.58 | 0.69 | 1.00 | 1.00 | 0.68 |
| papillary structure with non-serrated with mucin minus or plus | 0.37 | 0.48 | 0.37 | 0.48 | 0.90 | 0.69 | 0.69 |
| papillary structure with non-serrated with mucin minus | 0.48 | 0.58 | 0.37 | 0.58 | 1.00 | 0.89 | 0.79 |
| papillary structure with non-serrated with mucin plus | 0.20 | 0.40 | 0.80 | 0.80 | 1.00 | 0.60 | 1.00 |
| rail pattern | 1.00 | 1.00 | 0.79 | 0.79 | 1.00 | 1.00 | 1.00 |
| signet ring cell | 0.80 | 0.80 | 1.00 | 1.00 | 1.00 | 1.00 | 1.00 |
| signet ring cell with mucin plus | 1.00 | 1.00 | 1.00 | 1.00 | 1.00 | 1.00 | 1.00 |
| solid nest regardless of the size of nest | 0.58 | 0.90 | 0.79 | 0.79 | 1.00 | 0.69 | 1.00 |
| solid nest with large nest regardless of cell type | 0.79 | 0.79 | 0.37 | 0.47 | 1.00 | 1.00 | 0.68 |
| solid nest with large nest consisting of usual cell | 0.69 | 0.69 | 0.26 | 0.68 | 1.00 | 1.00 | 0.57 |
| solid nest with small nest regardless of cell type | 0.69 | 0.79 | 0.58 | 0.69 | 1.00 | 0.89 | 0.69 |
| solid nest with small nest consisting of usual cell | 0.69 | 0.58 | 0.37 | 0.58 | 1.00 | 0.89 | 0.79 |
| trabecular structure with any mucin pattern | 0.37 | 0.58 | 0.79 | 0.79 | 1.00 | 0.58 | 1.00 |
| trabecular structure with mucin minus | 0.79 | 0.79 | 0.79 | 0.79 | 1.00 | 1.00 | 1.00 |
| trabecular structure mucus leakage | 0.37 | 0.58 | 0.37 | 0.37 | 1.00 | 0.58 | 0.79 |
| tubular structure with any mucin pattern | 0.79 | 0.79 | 0.79 | 0.79 | 1.00 | 1.00 | 1.00 |
| tubular structure with mucin minus | 0.30 | 0.40 | 0.20 | 0.40 | 1.00 | 0.68 | 0.60 |
| tubular structure with mucin plus | 0.58 | 0.37 | 0.26 | 0.37 | 1.00 | 0.79 | 0.68 |
| tubular structure with mucus leakage | 1.00 | 1.00 | 1.00 | 1.00 | 1.00 | 1.00 | 1.00 |
| tumor budding | 0.79 | 0.79 | 0.79 | 0.79 | 1.00 | 1.00 | 1.00 |
| the percent of tumor content is over 50% | 1.00 | 1.00 | 1.00 | 1.00 | 1.00 | 1.00 | 1.00 |
| The values of three pathologists including A, B and SF are Cohen's κ-value for each observer. Individual Cohen's κ-value is calculated with the first annotation of pathomorphological features by SF (SF1) as the correct answer (ex. A1 vs SF1, A2 vs SF1, B1 vs SF1, B2 vs SF1, SF1 vs SF2). The inter-observer Cohen's κ-values are also shown (A1 vs A2, B1 vs B2). | | | | | | | |
